# Supplementary material
Source: PubMed Central journal article supplement (PMC6675406)
Supplement: NIHMS1519234-supplement-2.pdf [file NIHMS1519234-supplement-2.pdf]

# Supplemental Materials

## Quantifying the synergy of drug combinations with respect to potency and efficacy.

Christian T. Meyer<sup>† 1,3</sup>, David J. Wooten<sup>† 2,3</sup>, B. Bishal Paudel<sup>† 4,5</sup>, Joshua Bauer<sup>4,5,6</sup>, Keisha N. Hardeman<sup>4,5</sup>, David Westover<sup>6</sup>, Christine M. Lovly<sup>5,7</sup>, Leonard A. Harris<sup>3,4</sup>, Darren R. Tyson<sup>3,4</sup>, and Vito Quaranta<sup>\* 3,4,8,9</sup>

<sup>1</sup>Program in Chemical and Physical Biology, Vanderbilt University School of Medicine, Nashville, Tennessee.

<sup>2</sup>Program in Cancer Biology, Vanderbilt University School of Medicine, Nashville, Tennessee.

<sup>3</sup>Center for Cancer Systems Biology at Vanderbilt, Vanderbilt University, Nashville, Tennessee.

<sup>4</sup>Department of Biochemistry, Vanderbilt University Nashville, Tennessee.

<sup>5</sup>Vanderbilt Ingram Cancer Center, Vanderbilt University Medical Center, Nashville, Tennessee.

<sup>6</sup>Institute of Chemical Biology, High-Throughput Screening Facility, Vanderbilt University, Nashville, Tennessee.

<sup>7</sup>Department of Medicine, Division of Hematology and Oncology, Vanderbilt University Medical Center, Nashville, Tennessee.

<sup>8</sup>Department of Pharmacology, Vanderbilt University School of Medicine, Nashville, Tennessee.

<sup>9</sup>Lead Contact

\*Correspondence should be directed to V.Q. (vito.quaranta@vanderbilt.edu).

<sup>†</sup>These authors contributed equally to this work.

## Contents

|          |                             |           |
|----------|-----------------------------|-----------|
| <b>1</b> | <b>Supplemental Figures</b> | <b>2</b>  |
| <b>2</b> | <b>Supplemental Tables</b>  | <b>10</b> |

# 1 Supplemental Figures

**Figure S1: Phenomenological model underlying the Hill equation and corresponding extension to two drug case. Related to Figure 1.** A) The Hill equation can be derived for a system of two states with characteristic effects ( $E0$  and  $E1$ ) for which the transition rate, and thereby the equilibrium, between the states is a function of the where  $d$  is the drug concentration and  $h$  represents the hill coefficient (also known as cooperativity). In our system,  $E0$  and  $E1$  are defined by the proliferation rate in minimal and maximal drug concentration (i.e. DIP Rate), represented by the slope of a log-transformed growth curve. Here, the case of an anti-proliferative drug is considered where  $E1 < 0$  indicates maximal concentration of drug induces population regression and  $E0 > 0$  indicating an untreated, expanding population. B) Allosteric-inspired extension to a 4-state model of combination drug action used to derive the 2D generalization of the Hill equation. The equilibrium between the percent of cell affected by drug 1 or drug 2 alone ( $A1$  and  $A2$  respectively) and the doubly affected ( $A12$ ) populations is governed by the concentration of drug 1 modulated by  $\alpha_2$  (which quantifies drug 2's action on the potency of drug 1) and by the converse, drug 2 multiplied by  $\alpha_1$ .  $E3$  represents the maximal effect of the combination. C) Combination surfaces with asymmetric synergistic potency ( $\alpha_1 > 1$ ,  $\alpha_2 < 1$ ). The three surfaces correspond to the following conditions (from left to right): combination with asymmetric potency and no synergistic efficacy ( $E1 = E2 = E3$ ); combination with asymmetric synergistic potency with synergistic efficacy ( $\min(E1, E2) > E3$ ); combination with asymmetric synergistic potency with antagonistic efficacy ( $\min(E1, E2) < E3$ ).

**Figure S2: Conflation of synergy of potency and efficacy in current synergy frameworks. Related to Figure 1.** A) A survey of Loewe calculations on a range of hypothetical drug combinations across a DSD spanning synergistic to antagonistic potency and efficacy. For each combination of  $\beta$  and  $\log(\alpha)$  (where  $\alpha = \alpha_1 = \alpha_2$ ), a corresponding value for Loewe synergy was calculated at the drugs' EC50, resulting in a contour map (see bar above DSD for color legend, white is effect sizes undefined by Loewe, i.e., the effect of the combination is greater than the maximum of either drug alone). Along the contour lines, Loewe synergy values remain the same, indicating conflation of synergistic potency and efficacy. As an example, Loewe calculations yield the same value for drug combinations X and O (0.5); whereas MuSyC reveals that combination X is synergistically potent, while combination O is synergistically efficacious. Complete dose-response surfaces for X and O are also shown to further clarify the resolution of synergistic potency and efficacy by MuSyC (Right panels). B-F) Synergy calculations for other methods show the same conflation of synergy of potency and efficacy. Bliss was also calculated at the combination of each drug at the EC50, otherwise synergy metrics are calculated using the whole surface. See STAR Methods section Quantification and Statistical Analysis for details on synergy calculations. G) Combination Index precludes synergy of efficacy by enforcing the maximum effect of the drug to equal 0. This assumption results in poor fits when  $E_{max}$  does not equal zero which is commonly observed experimentally (e.g., Figure 5E). H) The reduction in fit quality for Combination Index is a monotonically decreasing function of  $E_{max}$  for  $E_{max} > 0$ . I-J) The equivalent dose model (Zimmer et al., 2016) also enforces an  $E_{max}$  of 0 resulting in a fit quality which decreases as  $E_{max}$  increases.

**Figure S3: Bayesian synergy parameter estimation in the MuSyC algorithm. Related to STAR Methods.** A) A particle swarm optimizer (PSO) was tested for convergence across several different data densities ranging from  $5 \times 5$  to  $25 \times 25$  grids. Within each density range, 25 different dose-response surfaces were fit (See STAR Methods section Quantification and Statistical Analysis, subsection Fitting Dose-Response Surfaces, for all parameters used). At all tested densities for all conditions, a minimum in the log-likelihood was observed after approximately 60 iterations. B) Comparison of the error in final fits of the parameters between three methods PSO alone followed by a non-linear least squares (NLLS) optimizer (Levenberg-Marquardt), Markov Chain Monte Carlo (MCMC) posterior estimation, and PSO seeded MCMC optimization. Y-axis is the L2-norm of the fitted parameters to the true parameters. Across all data densities, PSO seeded MCMC had the highest fit accuracy across different dose-response surface topologies. C) Synergy parameter uncertainty as a function of dose coverage.  $\sigma$  is the standard deviation of the MCMC trace. As the dose coverage decreases, there is a commensurate increase in the uncertainty of in the fit across different dose-response surfaces. D) Trace-plots and posterior distributions of  $\log(\alpha_1)$ ,  $\log(\alpha_2)$ , and  $E3$  for a surface where max dose is equal to the EC50 (bottom). Red line demarcates the true value. Middle plot is the z-score of 20 segments from the overall sample ordered by trace number. Parameters which have absolute z-scores  $> 2$  at any point in the trace are considered not to have converged. E) Trace-plots and posterior distributions of  $\log(\alpha_1)$ ,  $\log(\alpha_2)$ , and  $E3$

for a surface where max dose is 10,000 times the EC50 fully capturing the drug effect saturation. Posterior distributions are narrower than for the surface with less coverage corresponding to an increase in uncertainty. However, other factors than dose-selection can contribute to fit uncertainty including experimental noise, density of data, steepness of single drug curves (i.e., the hill coefficient), and quality of priors in the MCMC fit.

**Figure S4: Synergistic potency ( $\alpha_1$ ,  $\alpha_2$ ) and efficacy ( $\beta$ ) do not depend on the potency and efficacy of the single drugs (C and Emax) and are independent of one another. Related to Figure 2.** A) Jitter plot of the 64 surveyed single drug's Emax(obs), C [uM], and hill slope h. B) Synergy parameters do not correlate (Pearson-r) with a single drug's potency and efficacy in isolation. ( $\alpha_2$ =X potentiates osimertinib). C)  $\alpha_1$  is independent of  $\alpha_2$  in the NSCLC screen.  $\alpha_1$  vs.  $\alpha_2$  by drug class examining the potentiation of drug X by osimertinib ( $\alpha_1$ ) and the potentiation of osimertinib by drug X ( $\alpha_2$ ). Ceritinib is not potentiated by osimertinib (last panel) while osimertinib is potentiated by ceritinib (Figure 2C).

**Figure S5: Synergistic potency, synergistic efficacy, and maximal effect of combined RAFi and MEKi. Related to Figure 3.** A) Jitter plots of  $\log(\alpha_1)$  for each RAFi for the 4 MEKi tested.  $\alpha_1$  corresponds to the alteration in MEKi's effective dose due to the presence of a RAFi. Dashed line denotes zero separating synergistic and antagonistic potency. The color of plotted points is corresponds to the cell line as annotated at the bottom of the figure. B) Jitter plots of  $\log(\alpha_2)$  for each MEKi for the 4 RAFi tested.  $\alpha_2$  corresponds to the alteration in RAF inhibitor's effective dose due to the presence of a MEK inhibitor. C) Rank ordered jitter plots of the median  $\beta_{\text{obs}}$  for each drug combination across all cell lines. D) Distribution of maximal effects for RAFi alone (E1, 4 drugs), MEKi alone (E2, 4 drugs), and the combination (E3, 16 combinations) for each cell line. Orange bar denotes mean.

**Figure S6: Errors in Melanoma dataset for other methods. Related to Figure 5.** Distribution of synergy calculated by Loewe, CI, and Bliss for melanoma dataset. As in the PC9 data, Loewe was calculated directly from DIP rates, while CI and Bliss were calculated from 72-hour viability. Conditions for which synergy is undefined were not included (See STAR Methods, Section Quantification and Statistical Analysis). By these traditional methods, combinations of BRAF/MEK inhibitors in melanoma are ambiguous, spanning synergy (Syn-gray) and antagonism (Ant-white).  $\log(\alpha_1)$  is the RAFi's effect on the potency of the MEKi and  $\log(\alpha_2)$  is the reverse. Abbreviations of the RAF inhibitors are: dab=dabrafenib, plx=plx4720, raf=raf265, and vem=vemurafenib.

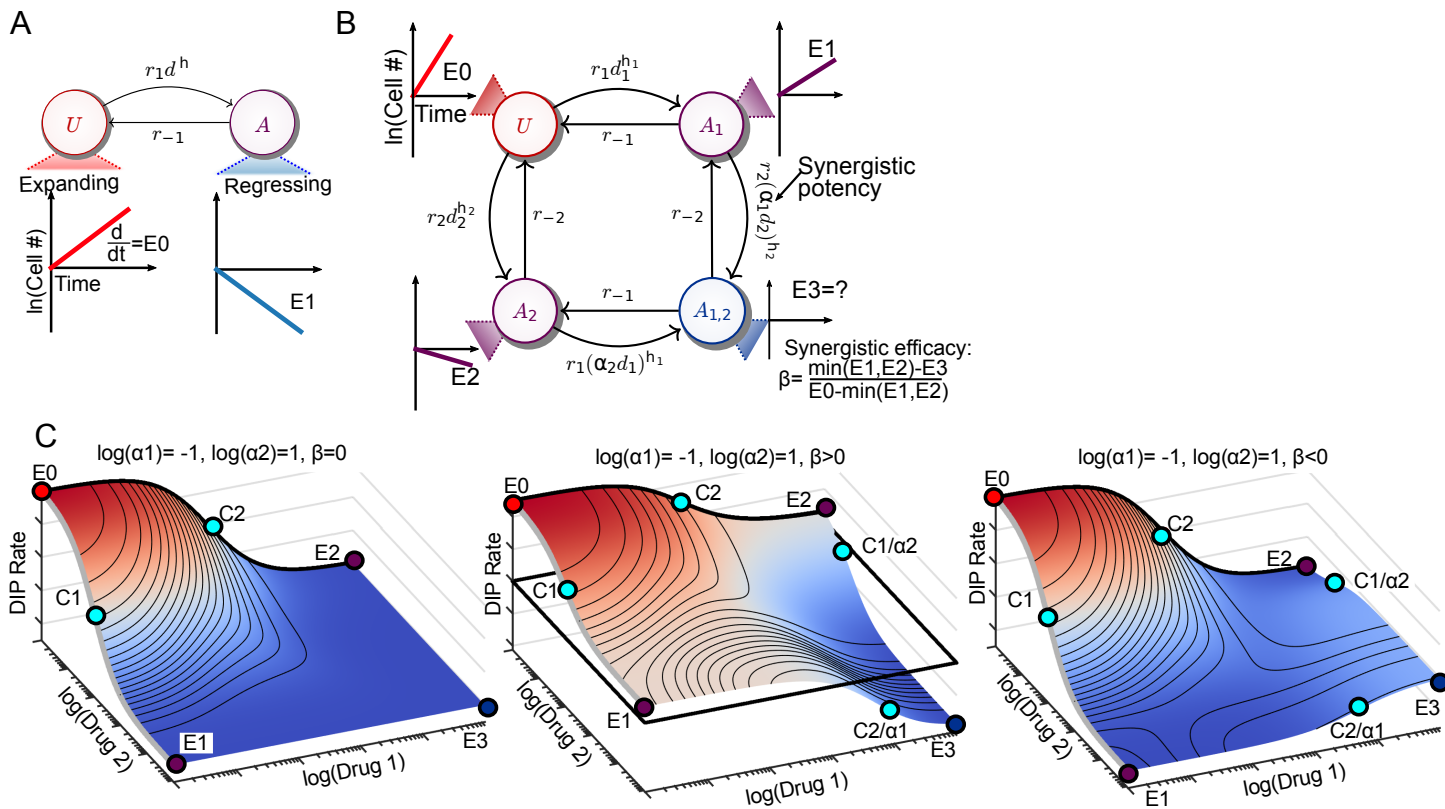

Figure S1

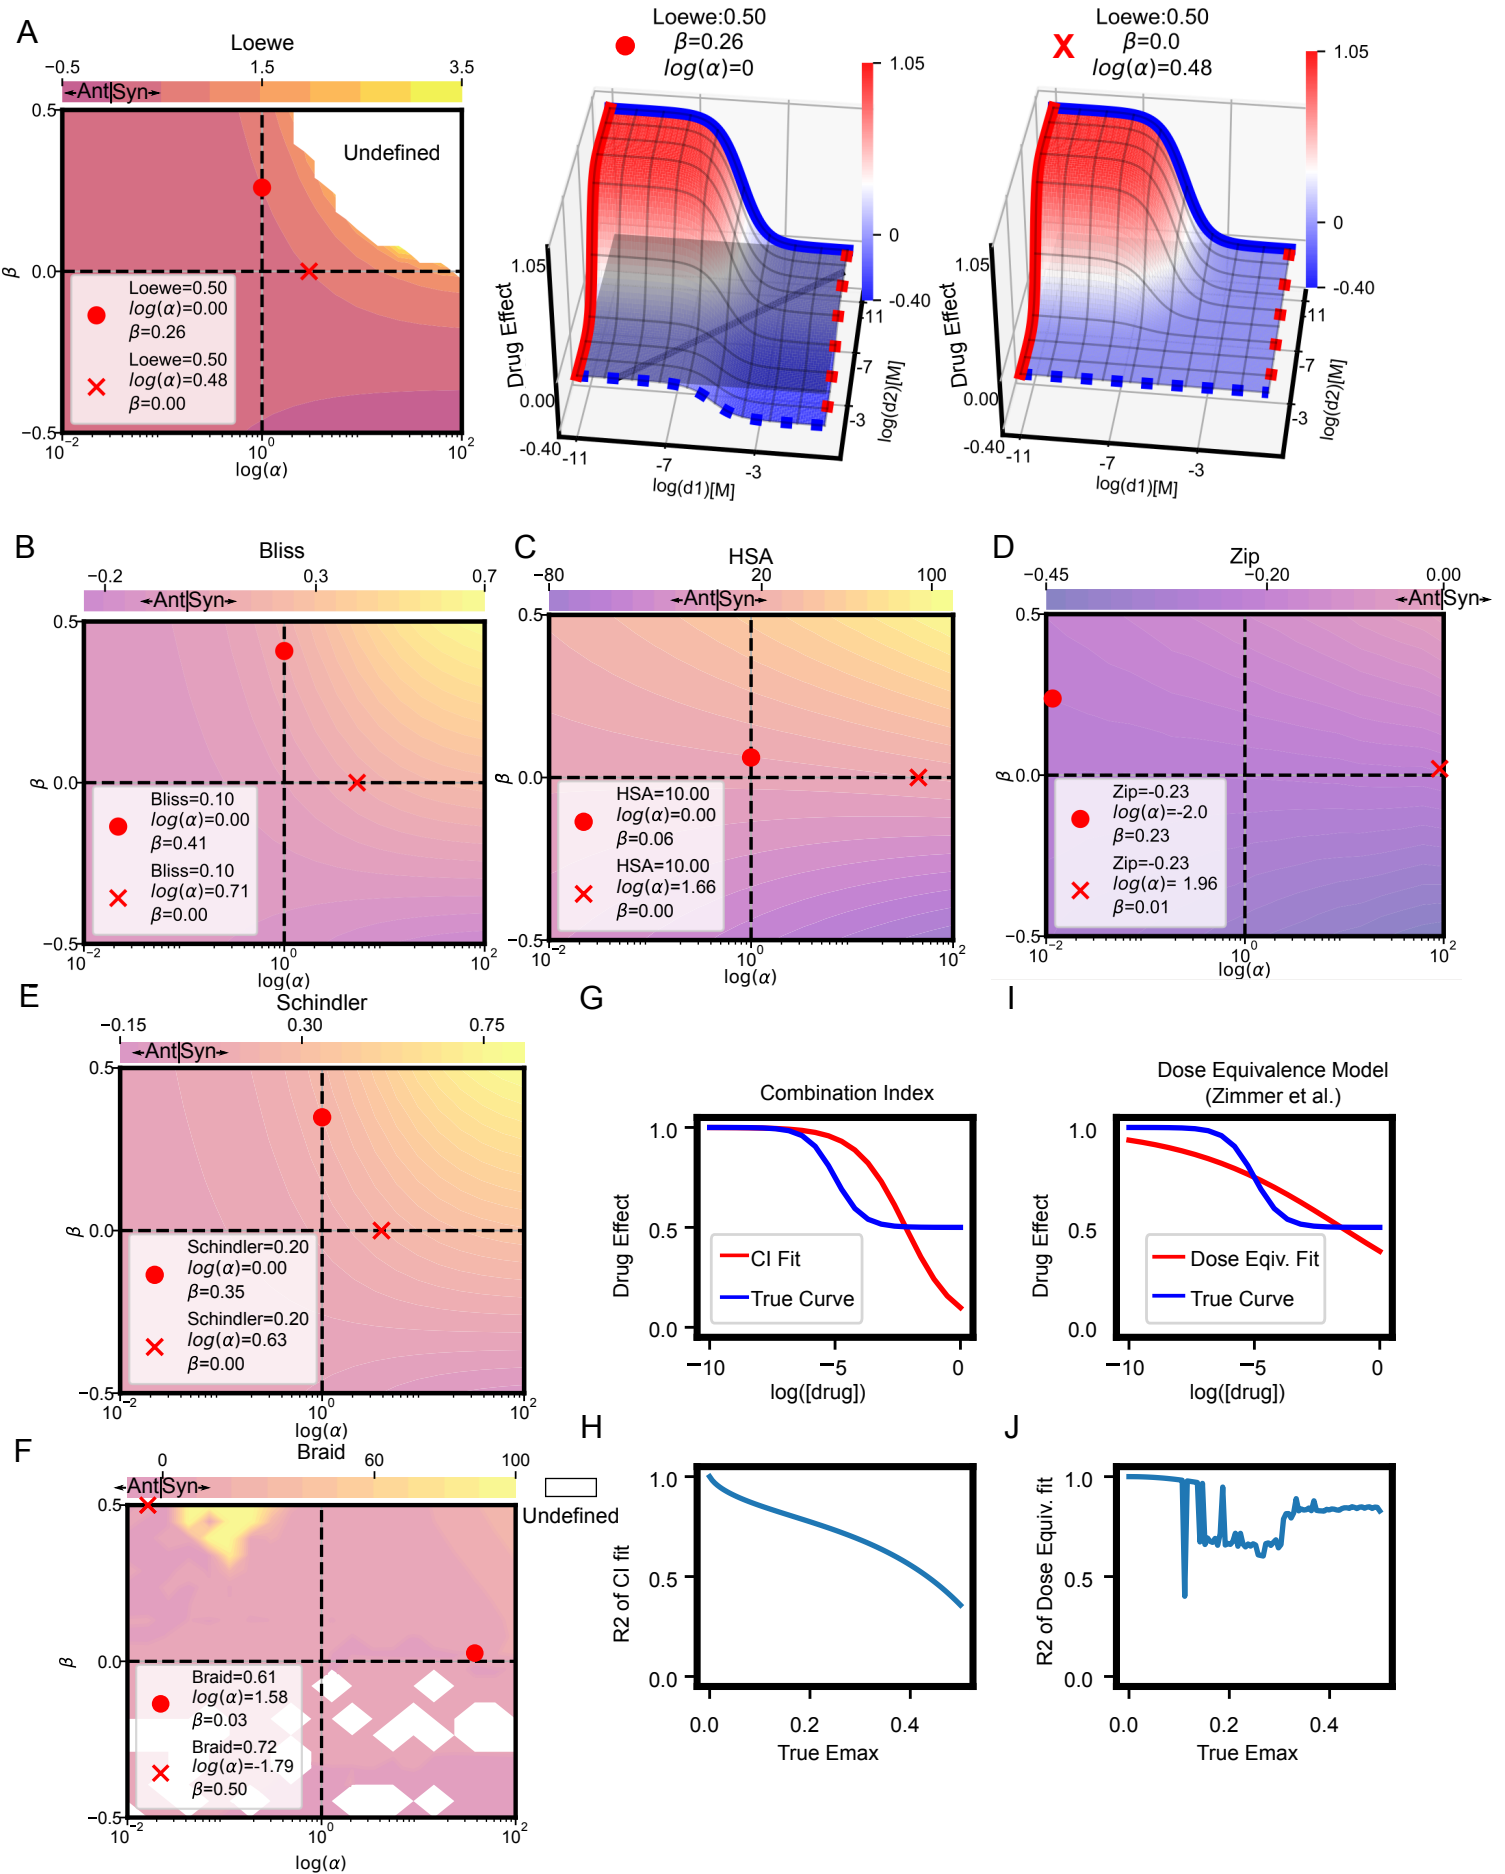

Figure S2

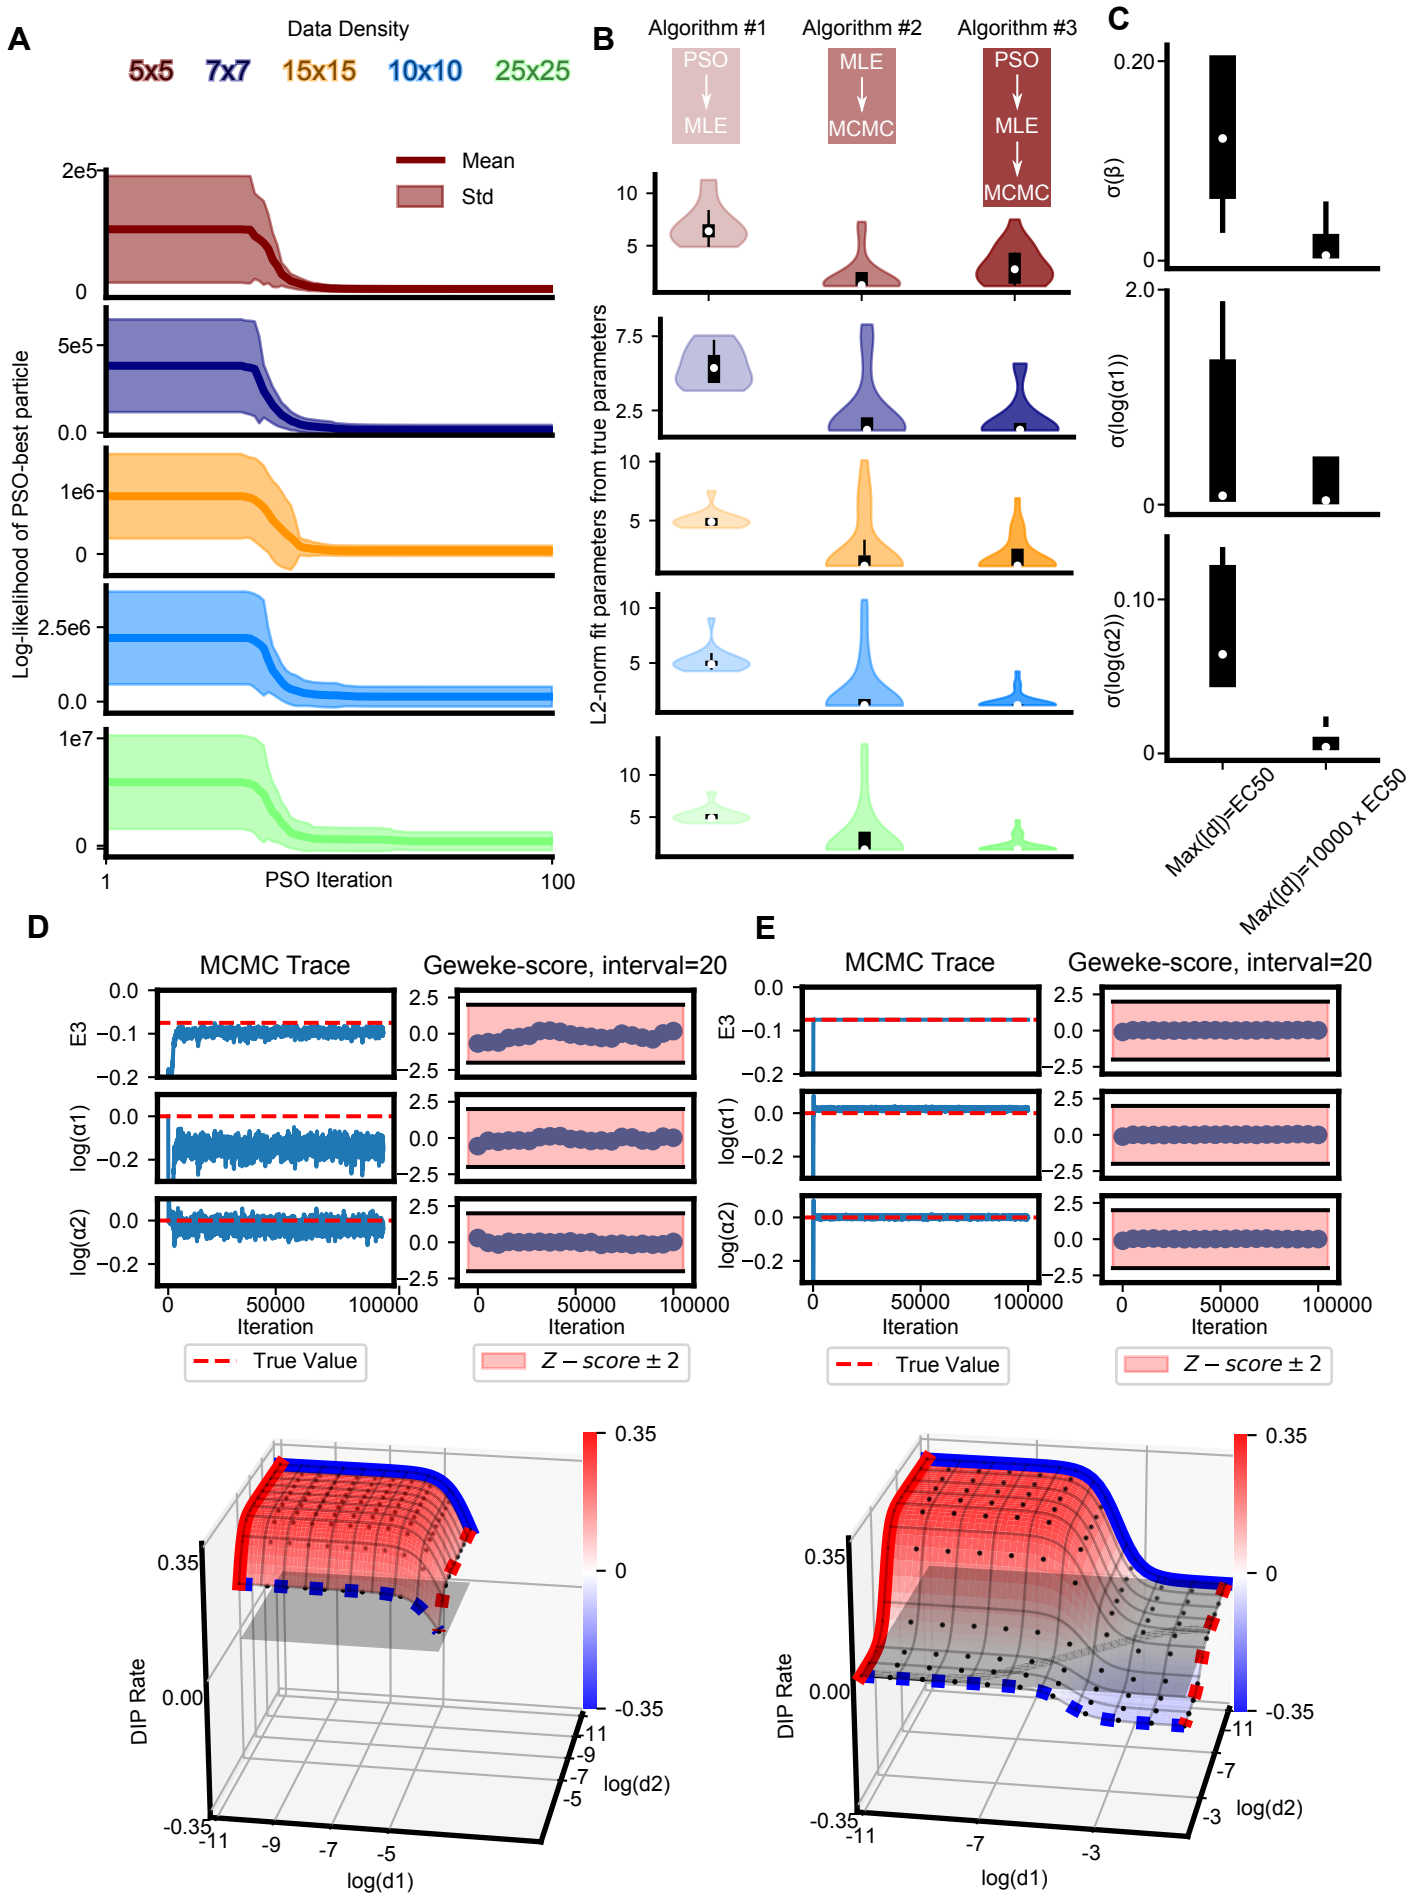

Figure S3

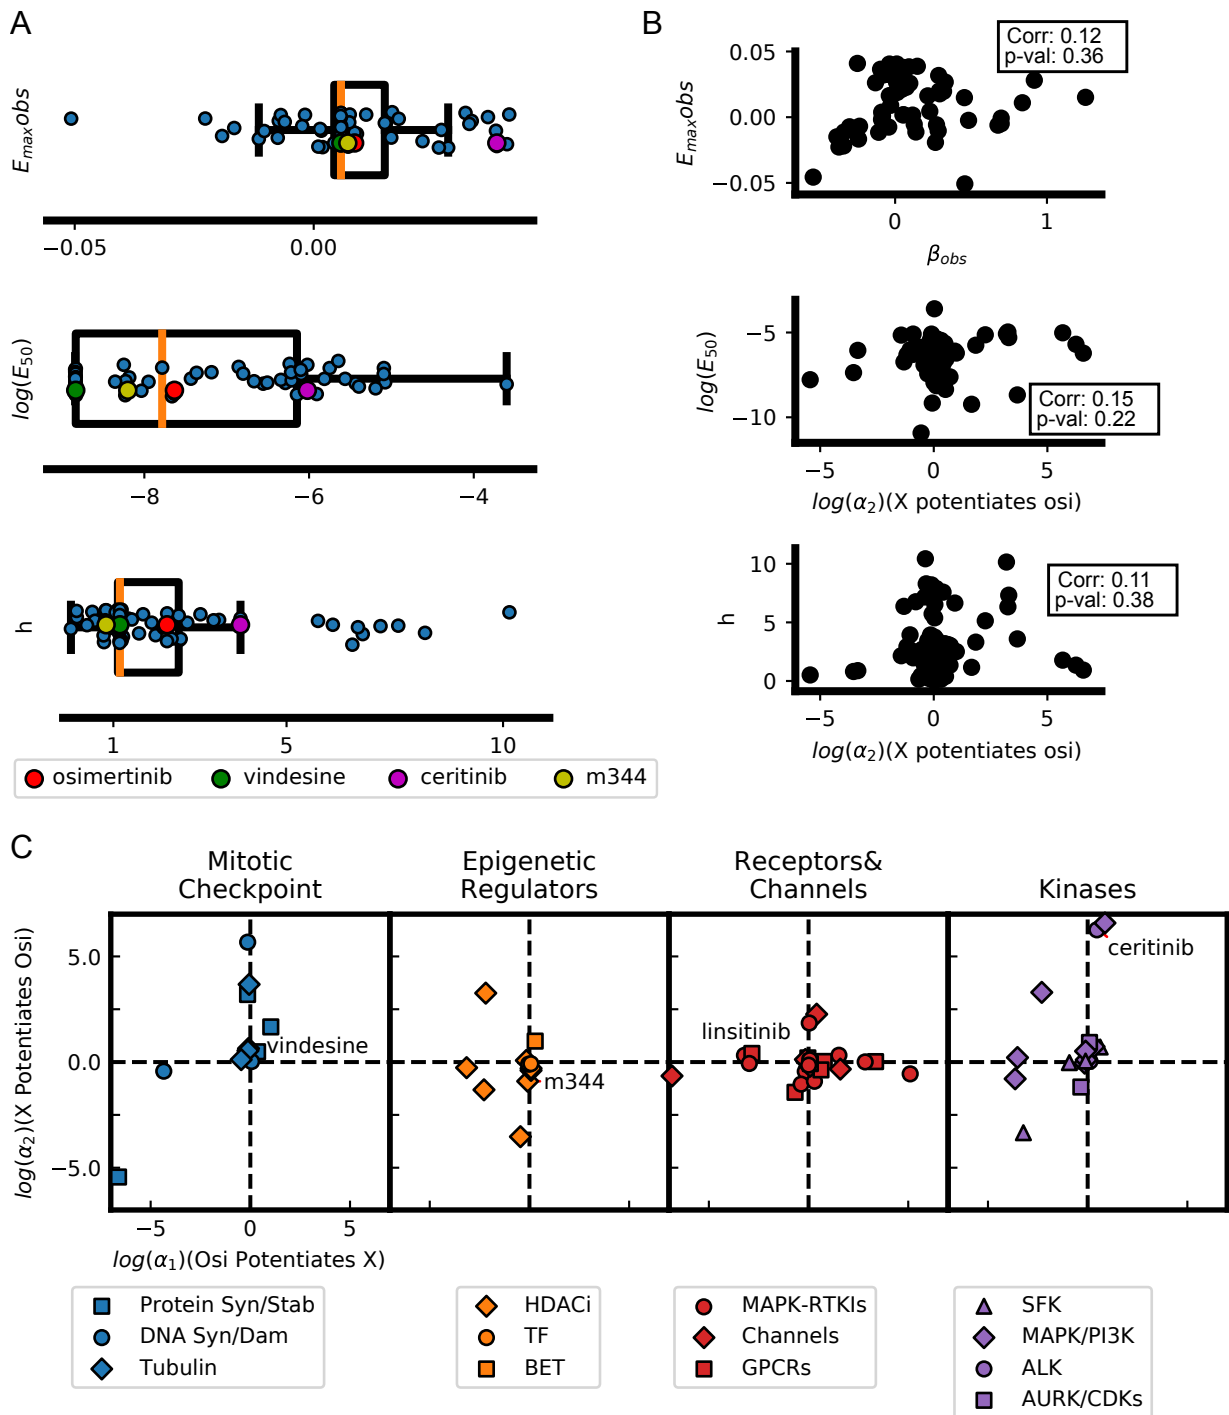

Figure S4

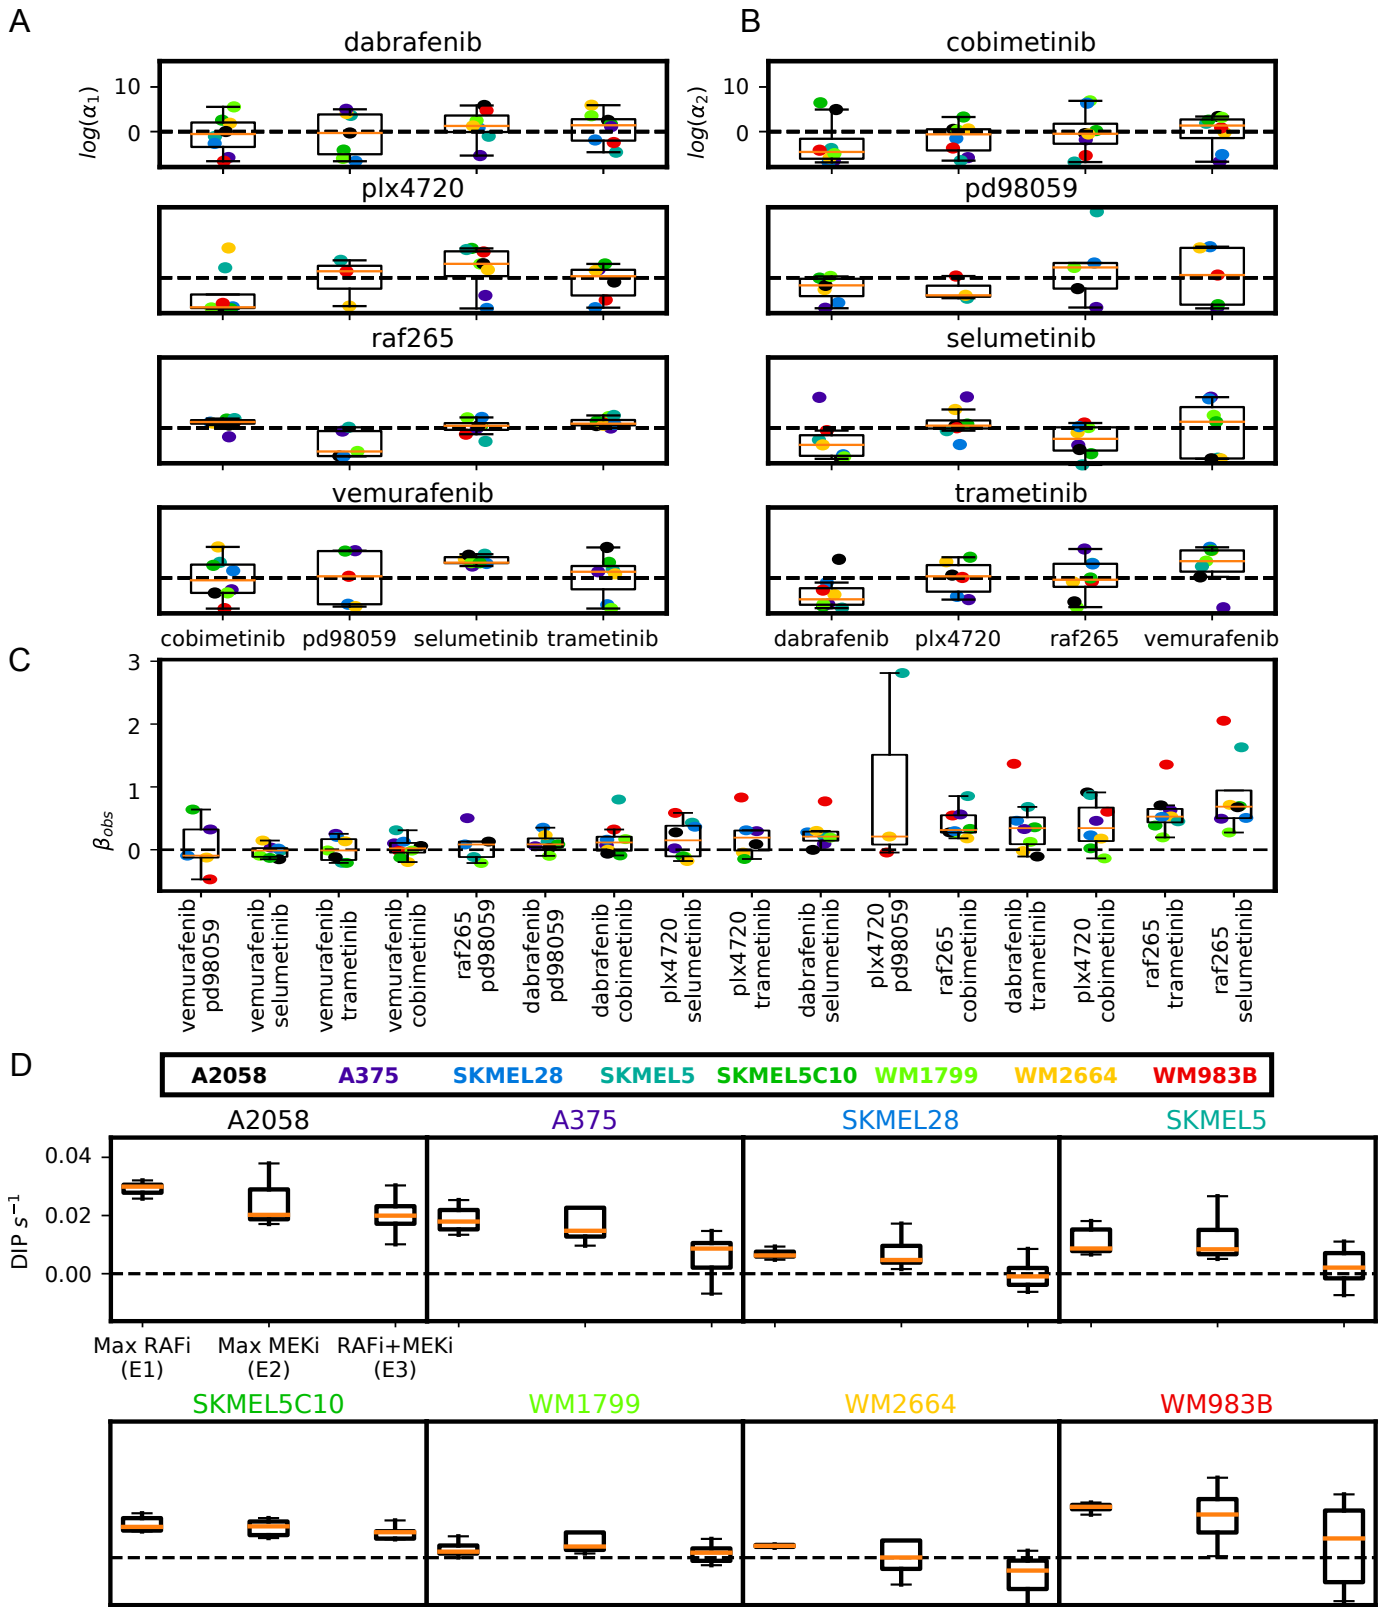

Figure S5



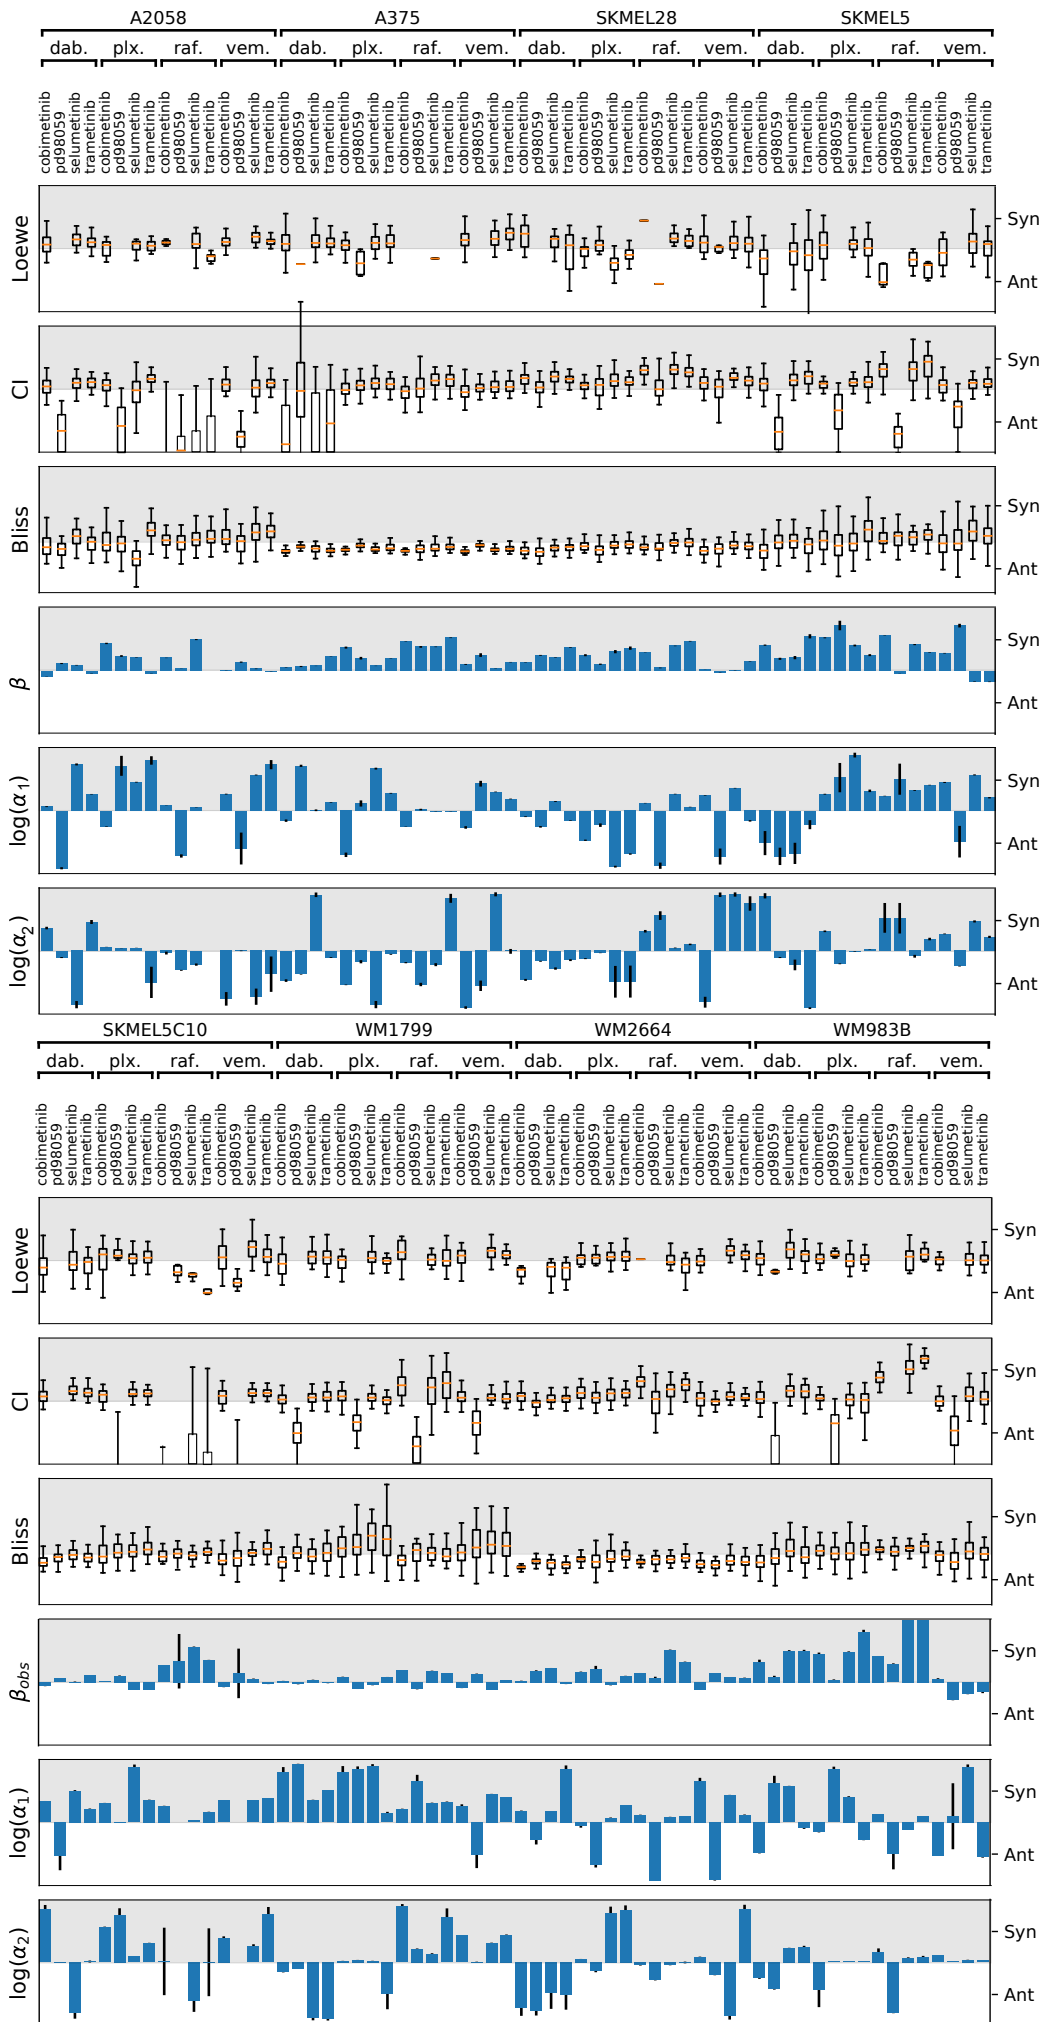

Figure S6

## 2 Supplemental Tables

Table S1: Annotation of parameters for the 2D Hill equation. Related to Figure 1, Figure S1.

|               |                                                                                                                     |
|---------------|---------------------------------------------------------------------------------------------------------------------|
| $U$           | Percent of unaffected cells                                                                                         |
| $A_1, A_2$    | Percent of cells affected by drug 1 and drug 2, respectively.                                                       |
| $A_{1,2}$     | Percent of cells affected by both drug 1 and drug 2.                                                                |
| $d_1, d_2$    | Drug concentrations for drug pair                                                                                   |
| $E_d$         | Measured DIP rate at $(d_1, d_2)$                                                                                   |
| $C_1, C_2$    | $EC_{50}$ for drugs 1 and 2 in isolation                                                                            |
| $r_x, r_{-x}$ | The forward and reverse transition rates between two states                                                         |
| $h_1, h_2$    | Hill coefficients for dose response curves of drug 1 and 2 in isolation                                             |
| $E_0$         | The basal rate of proliferation in drug naive condition                                                             |
| $E_1, E_2$    | $E_{max}$ of drug 1 and 2 in isolation                                                                              |
| $E_3$         | $E_{max}$ of the combination of drugs 1 and 2                                                                       |
| $\alpha_1$    | Measure of how $[d_1]$ modulates the effective dose of $[d_2]$ .                                                    |
| $\alpha_2$    | Measure of how $[d_2]$ modulates the effective dose of $[d_1]$ .                                                    |
| $\beta$       | Theoretical difference in maximal effect achievable with both drugs compared to the most efficacious drug alone.    |
| $\beta_{obs}$ | Observed difference in effect with both drugs at the maximum tested concentration as compared to either drug alone. |

Table S2: Annotation of anti-cancer drugs used in NSCLC and BRAF-mutant melanoma screens with nominal target and target class. Related to Figure 2,3.

| Class                 | Subclass             | Drug                | Tested Range      | Nominal Target           |             |
|-----------------------|----------------------|---------------------|-------------------|--------------------------|-------------|
| NSCLC                 |                      |                     |                   |                          |             |
| Epigenetic Regulators | BET                  | jq1                 | 4.0uM-0.1nM,0nM   | BET bromo-domain         |             |
|                       | HDACi                | abexinostat         | 0.3uM-0.8nM,0nM   | HDAC                     |             |
|                       |                      | entinostat          | 1.0uM-2.6nM,0nM   | HDAC                     |             |
|                       |                      | givinostat          | 10.0uM-41.1nM,0nM | HDAC                     |             |
|                       |                      | m344                | 1.0uM-2.6nM,0nM   | HDAC                     |             |
|                       |                      | mocetinostat        | 0.3uM-0.8nM,0nM   | HDAC                     |             |
|                       |                      | panobinostat        | 0.4uM-0.0nM,0nM   | HDAC                     |             |
|                       |                      | pracinostat         | 10.0uM-41.1nM,0nM | HDAC                     |             |
|                       |                      | quisinostat         | 1.0uM-2.6nM,0nM   | HDAC                     |             |
|                       |                      | TF                  | bazedoxifene      | 10.0uM-41.1nM,0nM        | ER          |
|                       | verteporfin          | 10.0uM-41.1nM,0nM   | YAP               |                          |             |
| Kinases               | ALK                  | ceritinib           | 4.0uM-0.1nM,0nM   | ALK/IGF1R                |             |
|                       |                      | ensartinib          | 4.0uM-0.1nM,0nM   | ALK                      |             |
|                       | AURK/CDKs            | bml259              | 1.0uM-2.6nM,0nM   | CDK                      |             |
|                       |                      | zm447439            | 4.0uM-0.1nM,0nM   | AURK                     |             |
|                       | MAPK/PI3K            | dactolisib          | 4.0uM-0.1nM,0nM   | PI3K/mTOR                |             |
|                       |                      | ly294002            | 10.0uM-41.1nM,0nM | PI3K                     |             |
|                       |                      | rapamycin           | 0.3uM-0.8nM,0nM   | mTOR                     |             |
|                       |                      | sb253226            | 10.0uM-41.1nM,0nM | p38                      |             |
|                       |                      | tak632              | 4.0uM-0.1nM,0nM   | RAF                      |             |
|                       |                      | trametinib          | 0.3uM-0.8nM,0nM   | MEK                      |             |
|                       |                      | u0126               | 10.0uM-41.1nM,0nM | MEK                      |             |
|                       |                      | ulixertinib         | 4.0uM-0.1nM,0nM   | ERK                      |             |
|                       |                      | SFK                 | bosutinib         | 10.0uM-41.1nM,0nM        | Bcr-ABL/SFK |
|                       |                      |                     | dasatinib         | 1.0uM-3.9nM,0nM          | SFK         |
|                       | pp2                  |                     | 10.0uM-41.1nM,0nM | SFK                      |             |
|                       | Mitotic Checkpoint   | DNA Syn/Dam         | quercetin         | 10.0uM-41.1nM,0nM        | SFK         |
|                       |                      |                     | carmustine        | 10.0uM-41.1nM,0nM        | DNA         |
|                       |                      |                     | methotrexate      | 4.0uM-0.1nM,0nM          | DHFR        |
|                       |                      | Protein Syn/Stab    | olaparib          | 20.0uM-0.3nM,0nM         | PARP        |
| carfilzomib           |                      |                     | 4.0uM-0.1nM,0nM   | Proteasome               |             |
| harringtonine         |                      |                     | 10.0uM-41.1nM,0nM | Ribosomes                |             |
| mg132                 |                      |                     | 4.0uM-0.1nM,0nM   | Proteasome               |             |
| tanespimycin          |                      |                     | 4.0uM-0.1nM,0nM   | HSP90                    |             |
| Tubulin               |                      | cephalomannine      | 10.0uM-41.1nM,0nM | Microtubules             |             |
|                       |                      | docetaxel           | 0.3uM-0.8nM,0nM   | Microtubules             |             |
|                       | vindesine            | 0.3uM-0.8nM,0nM     | Microtubules      |                          |             |
|                       | vinorelbina tartrate | 10.0uM-41.1nM,0nM   | Microtubules      |                          |             |
| Receptors & Channels  | Channels             | amiodarone          | 10.0uM-41.1nM,0nM | NA Channels              |             |
|                       |                      | bendroflumethiazide | 1.0uM-2.6nM,0nM   | Cl channel               |             |
|                       |                      | cabozantinib        | 4.0uM-0.1nM,0nM   | C-Met/Axl/Ret            |             |
|                       |                      | dronedarone         | 10.0uM-41.1nM,0nM | NA Channels              |             |
|                       |                      | ivacaftor           | 10.0uM-41.1nM,0nM | CFTR                     |             |
|                       |                      | nateglinide         | 1.0uM-2.6nM,0nM   | ATP-dependent K channels |             |

|                      |            |                                                                                                                                                                |                                                                                                                                                                                                                                                 |                                                                                                                                                                       |
|----------------------|------------|----------------------------------------------------------------------------------------------------------------------------------------------------------------|-------------------------------------------------------------------------------------------------------------------------------------------------------------------------------------------------------------------------------------------------|-----------------------------------------------------------------------------------------------------------------------------------------------------------------------|
| BRAF-Mutant Melanoma | GPCRs      | acetylcysteine<br>aprepitant<br>beclomethasone<br>dipropionate<br>loratadine<br>naftopidil<br>nebivolol<br>sp600125<br>thioridazine                            | 10.0uM-41.1nM,0nM<br>10.0uM-41.1nM,0nM<br>1.0uM-2.6nM,0nM<br>10.0uM-41.1nM,0nM<br>10.0uM-41.1nM,0nM<br>10.0uM-41.1nM,0nM<br>10.0uM-41.1nM,0nM<br>10.0uM-41.1nM,0nM                                                                              | Glutamate receptor<br>Neuromedin receptor<br>Glucocorticoid receptor<br>Histamine H1-receptors<br>B1-adrenergic receptor<br>B1 receptor<br>JNK<br>Adrenergic receptor |
|                      | MAPK-RTKIs | afatinib<br>ag 879<br>gefitinib<br>gsk1751853a<br>gsk994854a<br>gw458787a<br>gw644007x<br>gw694590a<br>gw770249x<br>linsitinib<br>ponatinib<br>tyrphostinag370 | 4.0uM-0.1nM,0nM<br>1.0uM-2.6nM,0nM<br>4.0uM-0.1nM,0nM<br>10.0uM-41.1nM,0nM<br>10.0uM-41.1nM,0nM<br>10.0uM-41.1nM,0nM<br>10.0uM-41.1nM,0nM<br>10.0uM-41.1nM,0nM<br>10.0uM-41.1nM,0nM<br>5.0uM-19.5nM,0nM<br>4.0uM-0.1nM,0nM<br>10.0uM-41.1nM,0nM | EGFR/HER2<br>HER2/RAF-1<br>EGFR<br>IGF1R/INSR<br>IGF1R/INSR<br>EGFR/ERBB4<br>Ret<br>TIE2<br>FLT3<br>IGF1R<br>FGFR<br>PDGFRbeta                                        |
| Kinases              | MAPK/PI3K  | dabrafenib<br>plx4720<br>raf265<br><br>vemurafenib<br>selumetinib<br>trametinib<br>pd98059<br>cobimetinib                                                      | 0.4nM-0.39nM,0nM<br>8.0uM-7.8nM,0nM<br>1.0uM-3.9nM,0nM<br><br>8.0uM-7.8nM,0nM<br>4.0uM-61pM,0nM<br>0.4uM-6.1pM,0nM<br>0.4uM-6.1pM,0nM<br>0.8uM-12pM,0nM                                                                                         | BRAFV600<br>BRAFV600E & CRAF1<br>CRAF,BRAF, &<br>BRAFV600E<br>BRAFV600<br>MEK1<br>MEK1/2<br>MEK1<br>MEK1                                                              |

Table S3: BRAFi sensitivity across CCLE BRAF-mutant melanoma cell line panel. Related to Figure 3.

| CCLE Cell Line      | DIP Rate ( $h^{-1}$ ) at [8uM] PLX4270 |
|---------------------|----------------------------------------|
| <i>A2058_SKIN</i>   | 0.030                                  |
| <i>A375_SKIN</i>    | 0.005                                  |
| <i>SKMEL28_SKIN</i> | 0.010                                  |
| <i>SKMEL5_SKIN</i>  | 0.014                                  |
| <i>WM115_SKIN</i>   | 0.013                                  |
| <i>WM1799_SKIN</i>  | -0.002                                 |
| <i>WM2664_SKIN</i>  | 0.003                                  |
| <i>WM793_SKIN</i>   | 0.015                                  |
| <i>WM88_SKIN</i>    | -0.020                                 |
| <i>WM983B_SKIN</i>  | 0.021                                  |

Table S4: Differentially Expressed Genes (DEGs) between SKMEL5 subclones SC01, SC07, SC10 whose expression significantly correlated to BRAFi insensitivity (Pearson  $r$ ) across panel of 10 cell-lines (expression data from *Subramanian et al.*). See Table S3 for quantification of sensitivity to BRAFi. Related to Figure 3.

| Positive Correlation with BRAFi insensitivity |       |         | Negative Correlation with BRAFi insensitivity |        |         |
|-----------------------------------------------|-------|---------|-----------------------------------------------|--------|---------|
| Gene symbol                                   | $r$   | p-value | Gene symbol                                   | $r$    | p-value |
| SLC7A11                                       | 0.816 | 0.004   | GRIK3                                         | -0.743 | 0.014   |
| SLC16A7                                       | 0.807 | 0.005   | PRELP                                         | -0.720 | 0.019   |
| TGFB1                                         | 0.666 | 0.036   | CPVL                                          | -0.684 | 0.029   |
| NOX5                                          | 0.649 | 0.042   | ITGA10                                        | -0.659 | 0.038   |
| LXN                                           | 0.646 | 0.044   |                                               |        |         |

Table S5: Description of nested model tiers used in MCMC fit. Related to STAR Methods.

| Model Tier | Fit Parameters                                                       | Approximations                                                                                                                            |
|------------|----------------------------------------------------------------------|-------------------------------------------------------------------------------------------------------------------------------------------|
| #5         | $\alpha_1, \alpha_2, E_3, E_1, E_2, C_1, C_2, h1, h2, E_0, r_1, r_2$ | 1. Rate of transition ( $r1,r2$ ) $\gg 1$ .                                                                                               |
| #4         | $\alpha_2, E_3, E_1, E_2, C_1, C_2, h1, h2, E_0$                     | 1. System obeys detail balance.                                                                                                           |
| #3         | $\alpha_2, E_3, E_1, E_2, C_1, C_2, h1, h2$                          | 1. All conditions tier 4<br>2. E0 is the minimally observed effect.                                                                       |
| #2         | $\alpha_2, E_3, E_1, E_2, C_1, C_2$                                  | 1. All conditions tiers 3,4<br>2. h1,h2 are from single drug fits or 1 if single fits failed converge.                                    |
| #1         | $\alpha_2, E_3, E_1, E_2$                                            | 1. All conditions tiers 2-4<br>2. C1,C2 are from single drug fits or the median concentration if single fits failed to converge.          |
| #0         | $\alpha_2, E_3$                                                      | 1. All conditions tiers 1-4<br>2. E1, E2 are assumed to be the maximally observed effect maximum concentration of d1 and d2 respectively. |
